# Supplementary material
Source: publisher site journal article supplement (https://www.dovepress.com/article/266095)
Supplement: Supplementary file 1 [file get_supplementary_file.php]

Figure S1

A

Result of STR matching analysis by your data.

- DSMZ Profile Database -

A graphical presentation is shown at the bottom of this page.

| EV          | Cell No. | Cell name         | Locus names |         |         |         |       |       |     |      |        | Figures |
|-------------|----------|-------------------|-------------|---------|---------|---------|-------|-------|-----|------|--------|---------|
|             |          |                   | D5S818      | D13S317 | D7S820  | D16S539 | VWA   | TH01  | AM  | TPOX | CSF1PO |         |
|             |          | Query (Your Cell) | 11,11       | 10,10   | 12,12   | 9,13    | 16,17 | 6,6   | X,Y | 9,11 | 10,12  |         |
| 1.00(36/36) | 54       | CAKI-2            | 11,11       | 10,10   | 12,12   | 9,13    | 16,17 | 6,6   | X,Y | 9,11 | 10,12  | -       |
| 1.00(36/36) | HTB-47   | Caki-2            | 11,11       | 10,10   | 12,12   | 9,13    | 16,17 | 6,6   | X,Y | 9,11 | 10,12  | -       |
| 0.78(28/36) | 762      | HAIR-M            | 11,13       | 9,10    | 12,12   | 9,11    | 16,17 | 6,6   | X,Y | 9,11 | 10,13  | -       |
| 0.61(22/36) | 768      | U-2904            | 11,11       | 12,12   | 12,12   | 11,13   | 16,17 | 6,9.3 | X,X | 8,11 | 12,14  | -       |
| 0.61(22/36) | CRL-5889 | NCI-H1703 [H1703] | 11,11       | 10,10   | 10,12   | 10,12   | 16,17 | 7,7   | X,Y | 8,11 | 12,12  | -       |
| 0.61(22/36) | CRL-5976 | NCI-H64 [H64]     | 11,11       | 10,10   | 10,12   | 9,12    | 17,18 | 6,6   | X,X | 8,8  | 10,10  | -       |
| 0.61(22/36) | CRL-7780 | TO 203.T          | 11,11       | 12,14   | 8,9     | 9,13    | 16,17 | 8,9.3 | X,Y | 9,11 | 11,12  | -       |
| 0.61(22/36) | JCRB0324 | BCNS1KO           | 11,11       | 8,9     | 10,12   | 9,11    | 14,17 | 6,6   | X,Y | 8,11 | 11,12  | -       |
| 0.61(22/36) | JCRB1158 | Yub633            | 11,11       | 8,9     | 10,12   | 9,12    | 14,17 | 6,6   | X,X | 8,11 | 10,12  | -       |
| 0.61(22/36) | JCRB1217 | MT-3              | 11,11       | 10,11   | 10.3,12 | 9,11    | 14,17 | 9,9   | X,Y | 8,9  | 10,12  | -       |
| 0.61(22/36) | JCRB3009 | BCNS1KO hTERT     | 11,11       | 8,9     | 10,12   | 9,11    | 14,17 | 6,6   | X,Y | 8,11 | 11,12  | -       |
| 0.61(22/36) | RCB0597  | SF8656            | 10,13       | 10,10   | 12,12   | 11,13   | 17,18 | 6,6   | X,X | 8,11 | 10,10  | -       |
| 0.61(22/36) | RCB1184  | Lu-165            | 9,13        | 10,10   | 12,12   | 9,11    | 16,16 | 9,9   | X,Y | 8,9  | 10,12  | -       |

B

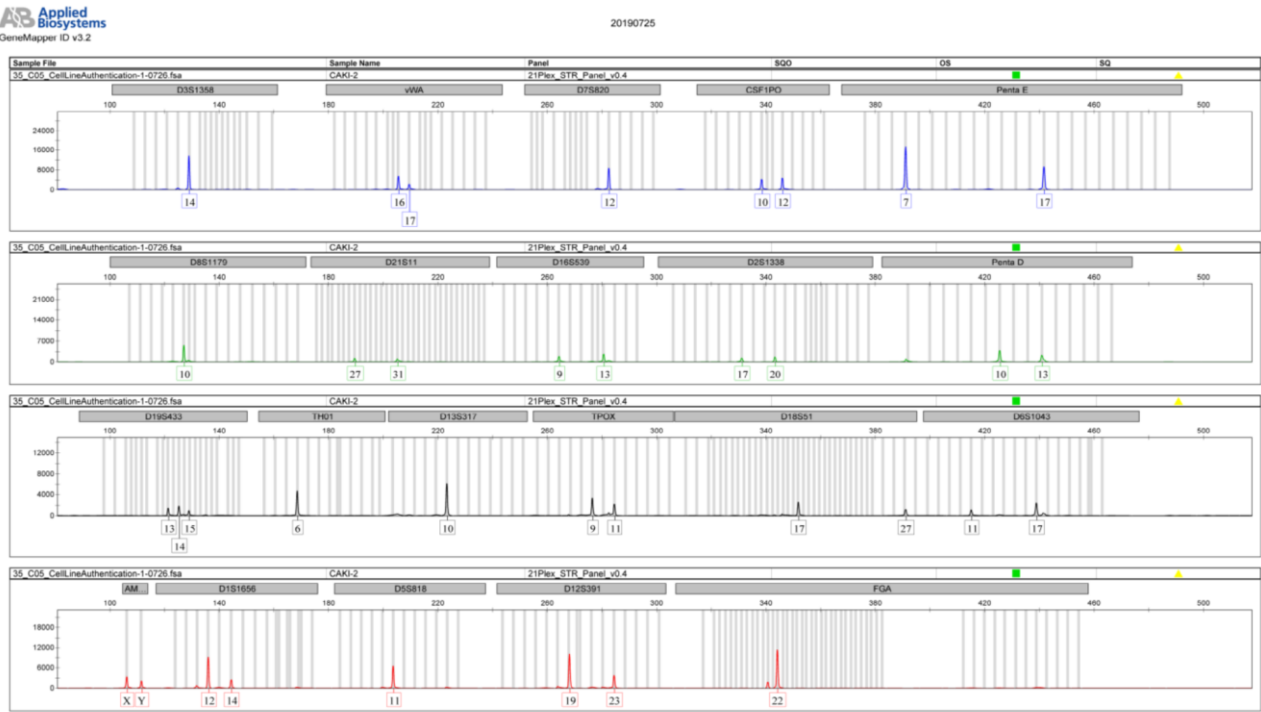

Supplementary figure 1. Authentication of Caki-2 cell line we used by STR profile.  
(A) Searching for the matching results of locus for Caki-2 cell line we used in the DSMZ profile database (in red frame).  
(B) Sequencing for locus of Caki-2 cell line we used and presentation of each characteristic locus.

# Figure S2

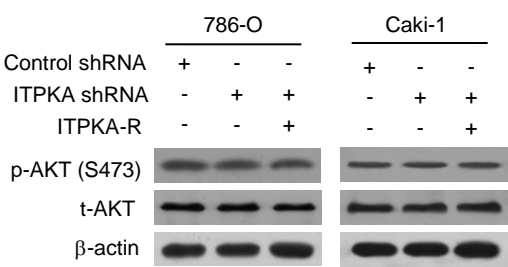

**Supplementary figure 2. ITPKA has little effect on mTORC2 signaling pathway in RCC.** 786-O and Caki-1 cells were stably transfected with Control shRNA or ITPKA shRNA or ITPKA shRNA plus ITPKA-R. Western-blot assay was performed to detect the protein expression changes of mTORC1 signaling pathway related-molecules, including t-AKT, p-AKT (S473) between indicated groups. The protein expression levels of β-actin were detected as the internal control.
